# Supplementary material for: Gastrointestinal lipolysis and trans-epithelial transport of SMEDDS via oral route
Source: PubMed Central journal article supplement — Acta Pharm Sin B. 2021 Mar 10;11(4):1010–20. doi: 10.1016/j.apsb.2021.03.006 (PMC8105768; doi:10.1016/j.apsb.2021.03.006), 2021-03-10
Supplement: mmc1.pdf [file mmc1.pdf]

## ORIGINAL ARTICLE

# Gastrointestinal lipolysis and trans-epithelial transport of SMEDDS *via* oral route

Fei Xia<sup>a</sup>, Zhongjian Chen<sup>b</sup>, Quangang Zhu<sup>b</sup>, Jianping Qi<sup>a</sup>, Xiaochun Dong<sup>a</sup>, Weili Zhao<sup>a</sup>, Wei Wu<sup>a</sup>, Yi Lu<sup>a,\*</sup>

<sup>a</sup>*Key Laboratory of Smart Drug Delivery of MOE, School of Pharmacy, Fudan University, Shanghai 201203, China*

<sup>b</sup>*Shanghai Skin Disease Hospital, Tongji University School of Medicine, Shanghai 200443, China*

Received 8 October 2020; received in revised form 31 December 2020; accepted 5 January 2021

\*Corresponding author. Tel./fax: +86 21 51980084.

E-mail address: fd\_luyi@fudan.edu.cn (Yi Lu).

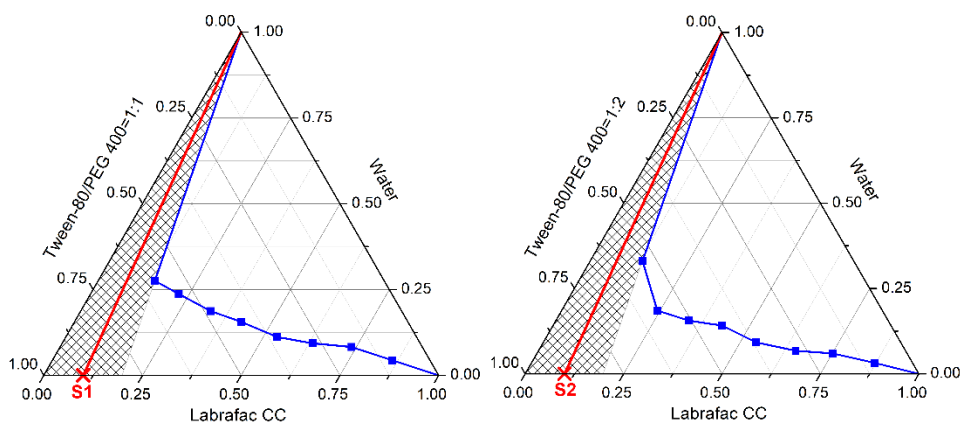

**Figure S1** Pseudo-ternary phase diagrams of Labrafac CC, Tween-80, and PEG 400. The shadow zone indicates the microemulsion region. The red crosses indicate the composition of S1 and S2.

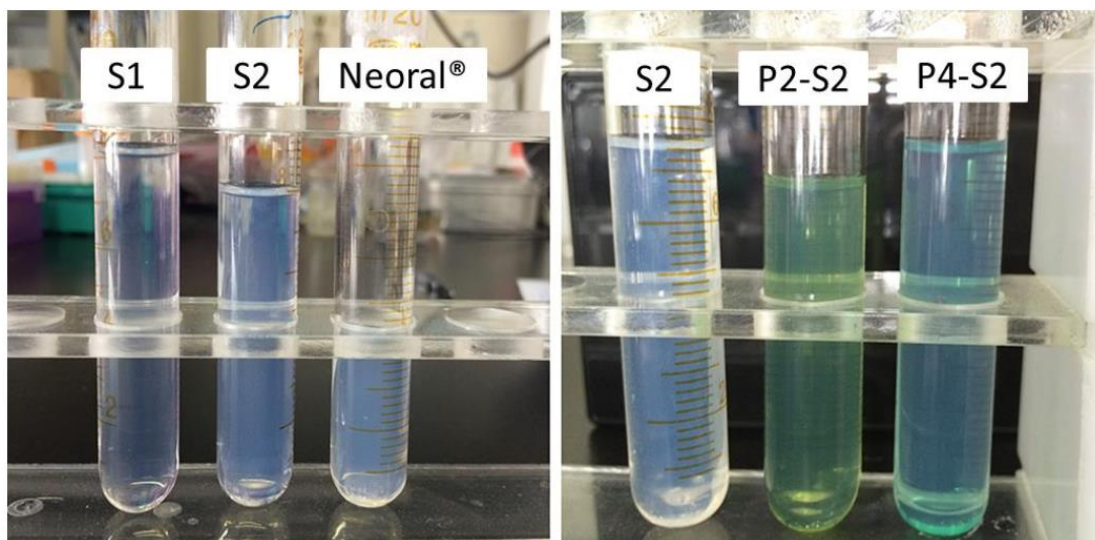

**Figure S2** Appearance of the aqueous dispersion of blank and P2/P4-loaded SMEDDS.
